# Supplementary material
Source: PubMed Central journal article supplement (PMC7533697)
Supplement: pnas.2007814117.sapp.pdf [file pnas.2007814117.sapp.pdf]

1  
2  
3  
4  
5  
6  
7 Supplementary Information for:

8  
9 **Microglia depletion exacerbates demyelination and impairs remyelination in a**  
10 **neurotropic coronavirus infection**

11  
12 <sup>1</sup>Alan Sariol, <sup>2</sup>Samantha Mackin, <sup>1</sup>Merri-Grace Allred, <sup>4</sup>Chen Ma, <sup>4</sup>Yu Zhou, <sup>4</sup>Qinran  
13 Zhang <sup>4</sup>Xiufen Zou, <sup>5</sup>Juan E. Abrahante, <sup>3</sup>David K. Meyerholz, and <sup>1,2</sup>Stanley Perlman

14  
15 <sup>1</sup>Interdisciplinary Program in Immunology, Departments of <sup>2</sup>Microbiology and Immunology  
16 and <sup>3</sup>Pathology, University of Iowa, Iowa City, IA 52242

17 <sup>4</sup>School of Mathematics and Statistics, Wuhan University, Wuhan, China, 430072

18 <sup>5</sup>University of Minnesota Informatics Institute (UMII), Minneapolis, MN, USA

19  
20 **Corresponding author:**

21 Stanley Perlman, M.D., Ph.D., Department of Microbiology and Immunology, BSB 3-712,  
22 University of Iowa, Iowa City, IA 52242, tele: 319-335-8549; FAX: 319-335-9006; email:  
23 Stanley-perlman@uiowa.edu.

24  
25  
26 **This PDF file includes:**

27  
28 Supplementary materials and methods  
29 Figures S1 to S2  
30 SI References  
31

32 **SI Materials and Methods**

33 *Isolation of immune cells from brain and spinal cord.* Mice were sacrificed and perfused  
34 with PBS at indicated days p.i. Brains and spinal cords were harvested and mechanically  
35 diced and digested with 1 mg/ml collagenase D (Roche) and 0.1 mg/ml DNase I (Roche)  
36 at 37°C for 30 minutes. Digested tissue was passed through a 70µm cell strainer and  
37 subsequently centrifuged in a 37% Percoll gradient. Pelleted cells were then washed and  
38 resuspended in culture media for further use in flow cytometric analysis or cell sorting.

39 *Antibodies and flow cytometry.* The following antibodies were used for flow cytometry in  
40 this study: CD45-PE-Cy7 (clone 30-F11; BioLegend); CD11b-eFluor 450 (clone M1/70;  
41 eBioscience); Ly6G-APC, -PE (clone 1A8, Biolegend); Ly6C-PerCP-Cy5.5, -APC (clone  
42 HK1.4; eBioscience); MHCII (IA/IE), -PerCP-eFluor710 (clone M5/114.15.2; eBioscience);  
43 MHCI (H-2Kb/H2-Db), -APC/Fire 750 (clone 28-8-6; Biolegend); CD16/CD32-PerCP-  
44 Cy5.5 (2.4G2; BD Biosciences); CD3-BV510 (clone 17A2, Biolegend); CD3e-APC, -  
45 PerCP-Cy5.5 (clone 145-2C11, Biolegend); CD4-eFluor 450, -PerCP-Cy5.5, -APC (clone  
46 RM4-5; eBioscience); CD8a-e450, -PE, -APC (clone 53-6.7; eBioscience); IFN-γ-PerCP-  
47 Cy5.5, -FITC (clone XMG1.2; eBioscience); FOXP3-FITC (clone FJK-16s; eBioscience);  
48 and CD11c-FITC (clone HL3; BD Biosciences). Data were acquired using a FACSVerse  
49 (BD Biosciences) and analyzed using FlowJo software (Tree Star). Cells were sorted  
50 using a FACSAria Fusion or FACSAria II (BD Biosciences).

51

52 *RNA extraction, qPCR, and primers.* Mice were sacrificed and perfused with PBS at  
53 indicated days p.i. Brains and spinal cords were manually homogenized in TRIzol reagent  
54 (Thermo Fisher Scientific) and RNA extracted according to manufacturer instructions.  
55 Separately, monocytes/macrophages (CD45<sup>hi</sup>CD11b<sup>+</sup>Ly6G<sup>-</sup>) were FACS-sorted from  
56 spinal cords as described above and RNA was extracted using an RNeasy Micro Kit  
57 (Qiagen), per manufacturer instructions. RNA was transcribed into cDNA using Moloney  
58 murine leukemia virus reverse transcriptase (M-MLV Reverse Transcriptase, Thermo  
59 Fisher Scientific). Expression levels were determined by quantitative PCR (qPCR) using  
60 a Quantstudio 3 Real-Time PCR system and PowerUp Sybr Green reagents (Applied  
61 Biosystems). Expression levels were normalized to those of hypoxanthine-guanine  
62 phosphoribosyltransferase (HPRT) and presented as  $2^{-\Delta Ct}$ , where  $\Delta Ct = Ct$  of gene of  
63 interest –  $Ct$  of *Hprt*. The following primer sets were used:

64

65

| Gene Name | Forward                 | Reverse                  |
|-----------|-------------------------|--------------------------|
| ApoE      | CTGACAGGATGCCTAGCC      | TCCCAGGGTTGGTTGCTTTG     |
| Axl       | GGAGGAGCCTGAGGACAAAGC   | ACAGCATCTTGAAGCCAGAGTAGG |
| Clec7a    | GACTTCAGCACTCAAGACATCC  | TTGTGTCGCCAAAATGCTAGG    |
| CXCL12    | TGCATCAAGTGACGGTAAACCA  | CACAGTTTGGAGTGTTGAGGAT   |
| MHV gRNA  | AGGGAGTTTGACCTTGTTTCAG  | ATAATGCACCTGTCATCCTCG    |
| HPRT      | GCGTCGTGATTAGCGATGATG   | CTCGAGCAAGTCTTTCAGTCC    |
| IGF1      | CCGAGGGGCTTTTACTTCAACAA | CGGAAGCAACACTCATCCACAA   |
| Lgals3    | TTGAAGCTGACCACTTCAAGGTT | AGGTTCTTCATCCGATGGTTGT   |
| Tgm2      | GAAGGAACACGGCTGTCAGCAA  | GATGAGCAGGTTGCTGTTCTGG   |

66

67 *Viral plaque assay.* Mice were sacrificed and perfused with PBS. Brains and spinal cords  
68 were harvested and manually homogenized in PBS and frozen. Frozen samples were then  
69 thawed and centrifuged to pellet cells and tissue. Virus titers in the resulting supernatants  
70 were determined by plaque assay of HeLa-MHVR cells, as previously described (1).

71

72 *Quantification of demyelination, vacuolization, and cellular debris.* Following PBS  
73 perfusion, spinal cords were harvested and bisected in the mid-sagittal plane, then fixed  
74 in zinc formalin. Fixed spinal cords were then embedded in paraffin and 8µm sections  
75 were cut in the sagittal plane and stained with Solvent blue 38 (Sigma-Aldrich), also known  
76 as Luxol fast blue (LFB), and counterstained with Harris hematoxylin (Leica) and Eosin Y  
77 (Sigma-Aldrich) for visualization of demyelinating lesions and infiltrating cells. Sections  
78 were then imaged using an Olympus BX61 light microscope and demyelination quantified  
79 by tracing both demyelinating lesions and total white matter in ImageJ software (NIH).  
80 Percent demyelination was then calculated as a ratio of the total area of demyelinating  
81 lesions over total white matter area for each spinal cord.

82 For quantification of vacuolization and cellular debris, LFB and H&E-stained sections were  
83 examined using a post-examination method of masking the pathologist to tissue group  
84 assignments (2). Tissues were evaluated for degeneration changes, and in these regions,  
85 clear spaced vacuolization (both number and size) and extent of cellular debris (i.e.  
86 pyknotic nuclear debris) were both evaluated per 400x field (i.e., 0.058917 mm<sup>2</sup> per 400x  
87 field).

88

89 *Intracellular cytokine and transcription factor staining.* Immune cells were isolated from  
90 spinal cords as described above, then stimulated with JHMV-specific M133 or S510

91 peptide (Bio-synthesis Inc., Genscript) in complete RPMI 1640 media (Gibco) in the  
92 presence of GolgiPlug (1µg/ml, BD Biosciences) and antigen-presenting cells (CHB3  
93 cells, B cell line, H-2D<sup>b</sup>, I-A<sup>b</sup>) for 6 hours at 37°C. The M133 and S510 peptides  
94 encompasses residues 133–147 of the transmembrane (M) protein, and residues 510–  
95 518 of the surface (S) glycoprotein and are the immunodominant CD4 and CD8 T cell  
96 epitopes, respectively (3–5). These peptides were used at a final concentration of 5 µM  
97 (M133) or 1 µM (S510). BD Cytofix/Cytoperm and Perm/Wash buffers (BD Biosciences)  
98 were used for cell fixation/permeabilization and subsequent staining for intracellular  
99 cytokines. For Foxp3 staining, an eBioscience Foxp3 / Transcription Factor Staining Buffer  
100 Set was used for fixation/permeabilization and subsequent staining.

101

102 *RNA-Seq and gene expression profiling of microglia.* Microglia (CD45<sup>int</sup> CD11b<sup>+</sup>) were  
103 sorted from isolated immune cells of spinal cords at the indicated days p.i. RNA was  
104 isolated using an RNeasy Micro Kit (Qiagen) according to manufacturer's instructions.  
105 Subsequent library preparation and sequencing was performed at the University of  
106 Minnesota Genomics Center.

107 RNA isolates were quantified using a fluorimetric RiboGreen assay and RNA integrity was  
108 assessed using capillary electrophoresis (Agilent BioAnalyzer 2100) to generate an RNA  
109 integrity number (RIN). Samples with RIN values above 2-3 and at least 250 pg total RNA  
110 were then used to generate sequencing libraries using a SMARTer Stranded Total RNA-  
111 Seq v2 – Pico Mammalian kit (Takara Bio). Briefly, between 250pg-10ng of total RNA were  
112 fragmented and then reverse transcribed into cDNA using random primers, with a template  
113 switching oligo incorporated during cDNA synthesis to allow for full length cDNA synthesis  
114 and retain strand specificity. Illumina sequencing adapters and barcodes were then added  
115 to the cDNA by PCR, followed by cleavage of ribosomal cDNA. Uncleaved fragments were  
116 then enriched by PCR for 12-16 cycles. Final library size distribution was again validated  
117 using capillary electrophoresis and quantified using fluorimetry (PicoGreen). Indexed  
118 libraries were then normalized and pooled for sequencing.

119 Libraries were then loaded onto a NextSeq 550 (single read, Illumina) cartridge, where  
120 clustering occurred on-board the instrument. After clustering, sequencing was  
121 commenced using Illumina's 2-color SBS chemistry. Following sequencing, Base call  
122 (.bcl) files for each cycle of sequencing were generated by Illumina Real Time Analysis  
123 software. Primary analysis and de-multiplexing were performed using Illumina's CASAVA

124 software 1.8.2. The end result of the CASAVA workflow was de-multiplexed FASTQ files  
125 for subsequent analysis.

126 75bp FastQ single-end reads (19.7-25.9 million reads per sample) were trimmed using  
127 Trimmomatic (version 0.33) enabled with the optional “-q” option; 3bp sliding-window  
128 trimming from 3’ end required minimum Q30. Quality control of raw sequence data for  
129 each sample was performed using FastQC. Read mapping was performed via Hisat2  
130 (v2.1.0) using the mouse genome (mm10) as reference. Gene quantification was  
131 performed using Feature Counts for raw read counts. Differentially expressed genes were  
132 identified using the edgeR (negative binomial) feature in CLCGWB (Qiagen) using raw  
133 read counts. We filtered the generated list on the basis of a minimum 2 absolute fold  
134 change after  $\log_2$  transformation and an FDR corrected p value < 0.05. Heat maps of both  
135 total and selected differentially expressed genes were generated using Heatmapper  
136 software (6). Complete RNA-Seq data were deposited in the NCBI’s Gene Expression  
137 Omnibus (GEO) database (GSE144911).

138

139 *Electron microscopy and toluidine blue staining.* Mice were sacrificed and perfused with  
140 PBS at 21 dpi. Spinal cords were removed and fixed in 2.5% glutaraldehyde with 0.1M  
141 sodium cacodylate. Samples were then postfixed in 1% osmium tetroxide, stained in  
142 2.5% uranyl acetate, and dehydrated and embedded in Epon resin. Sections were cut on  
143 a Leica EM UC6 ultramicrotome to 80nm thickness for toluidine blue staining or 8nm and  
144 mounted on copper slot grids for use in transmission electron microscopy. Sections were  
145 stained with toluidine blue and mounted on slides for subsequent visualization on an  
146 Olympus BX61 microscope. Sections on slot grids were then contrasted with 5% uranyl  
147 acetate and Reynold’s lead citrate. Electron micrographs were obtained on a Hitachi  
148 HT7800 transmission electron microscope.

149

150 *Axon measurement and g-ratio calculation.* Inner axon diameter, total myelinated axon  
151 diameter, and myelin thickness were measured using ImageJ software on electron  
152 micrographs. g-ratios were calculated as (inner axon diameter/total myelinated axon  
153 diameter). g-ratios were displayed both independently and as a function of inner axon  
154 diameter. Myelin thickness was displayed both independently and as a function of inner  
155 axon diameter.

156

157 *Immunofluorescence.* Following sacrifice and perfusion at indicated days p.i., spinal cords  
158 were fixed in 4% paraformaldehyde, followed by immersion in 10%, 20%, and 30%  
159 sucrose solutions for cryoprotection. Samples were frozen by heat displacement and cut  
160 to 8µm thickness on a Leica Microm cryostat. Sections were then immersed in PBS with  
161 0.1% Triton-X (Sigma-Aldrich), incubated in CAS block (Thermo Fisher Scientific), and  
162 incubated with a 1:500 dilution of rabbit anti-Olig2 polyclonal antibody (Millipore) at 4°C in  
163 a humidity chamber overnight. Sections were stained with a 1:200 dilution of Alexa Fluor  
164 Plus 488 goat-anti-rabbit secondary antibody (Thermo Fisher Scientific) for one hour prior  
165 to mounting with Vectashield Antifade Reagent (Vectashield Laboratories) and imaging  
166 with an Olympus BX61 microscope. Olig2<sup>+</sup> cells were manually counted using ImageJ  
167 software (NIH) and displayed as a ratio of cells per area of counting in mm<sup>2</sup>.  
168 *Statistics:* Data are presented as the mean ± SEM. Mann-Whitney *U* test were used to  
169 analyze differences between groups. P values of less than .05 were considered significant.  
170 \**P*<0.05, \*\**P*<0.01, \*\*\**P*<0.001, \*\*\*\**P*<0.0001.

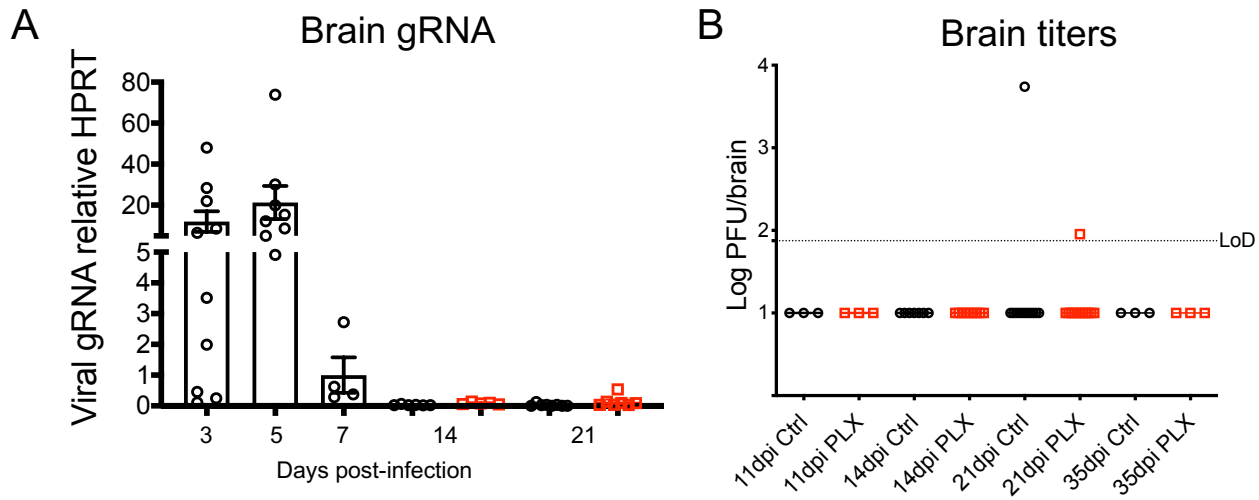

172 **Supplemental Figure S1: Virus is cleared in the brain beginning at 7 dpi.** Mice were  
 173 infected intracranially with 700 PFU JHMV, then fed at day 7 p.i. with PLX5622-containing  
 174 or control chow. Expression levels of viral genomic RNA as assessed by qPCR (**A**) (n=4-  
 175 10 mice/group) and infectious virus titers as determined by plaque assay (**B**) (n=3-12  
 176 mice/group) in the brain.  
 177

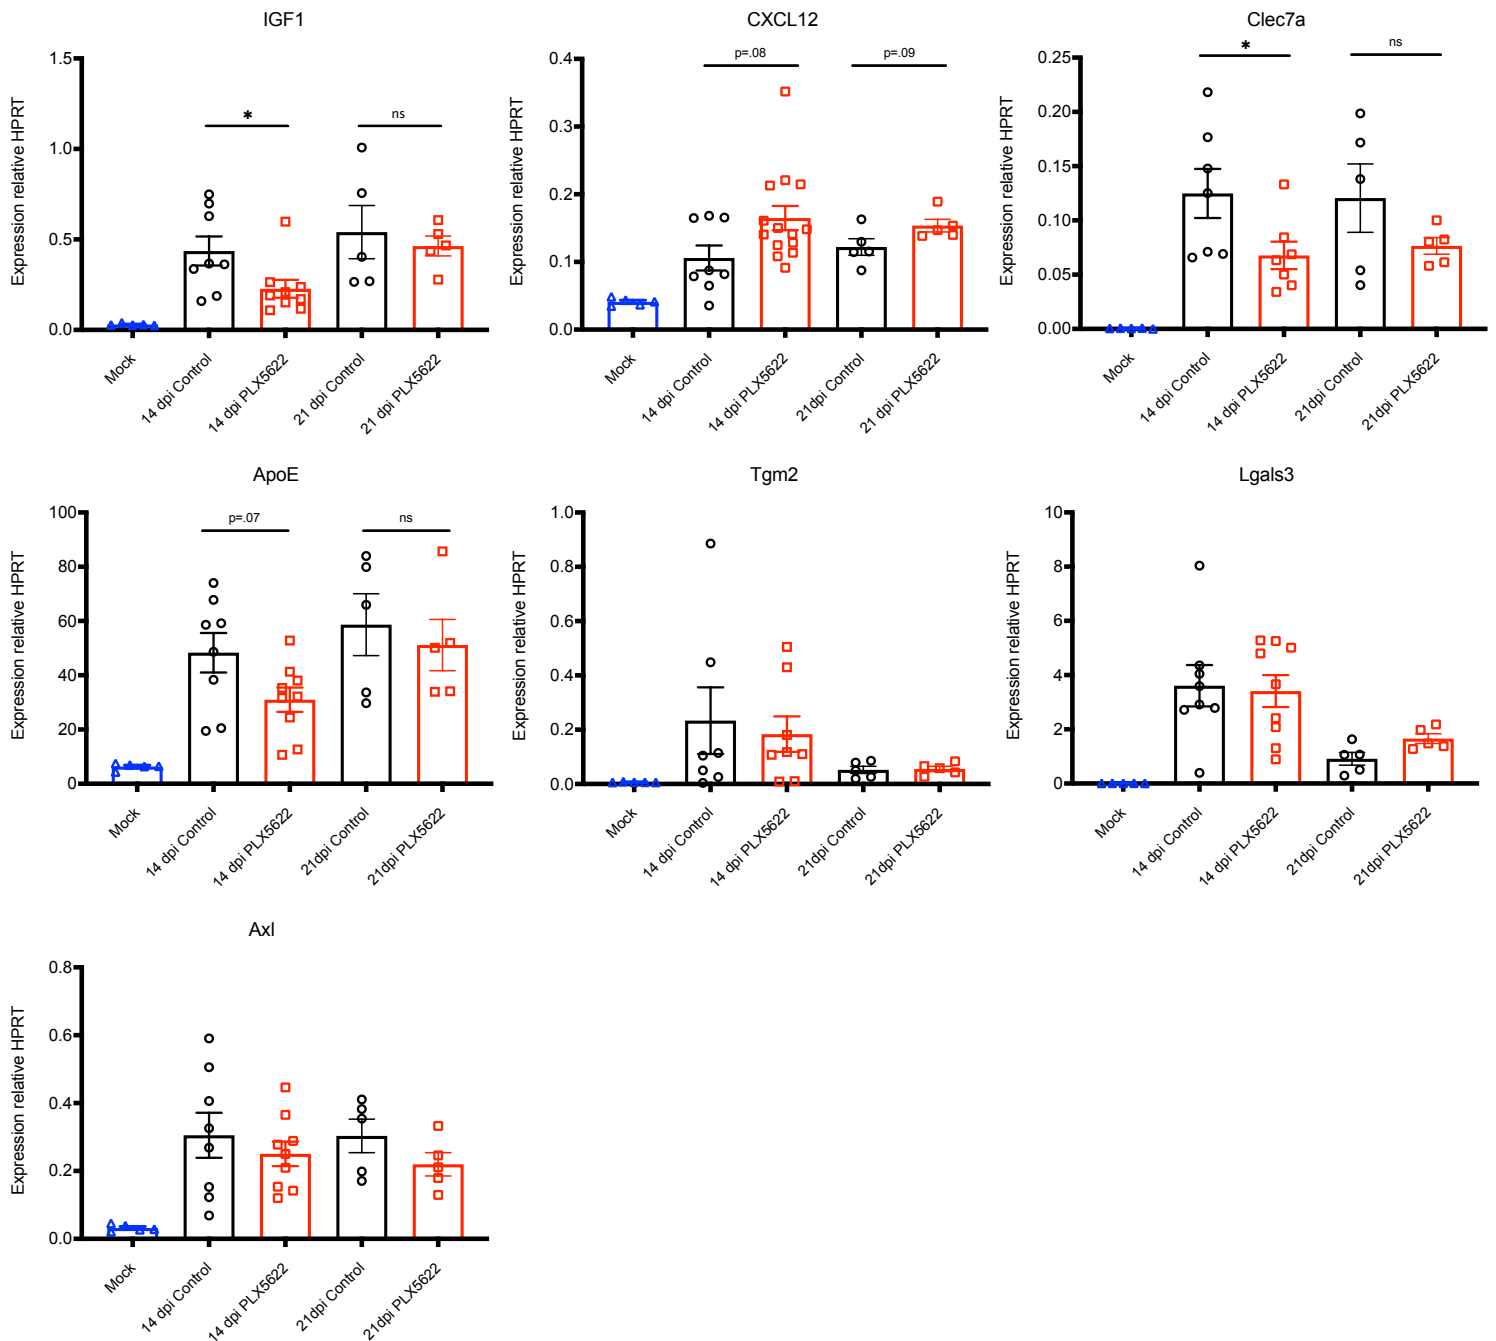

178

179 **Supplemental Figure S2: qPCR of genes involved in remyelination and debris**  
 180 **clearance in whole spinal cord.** Infected mice were treated at day 7 p.i. with PLX5622-  
 181 containing or control feed. Spinal cords were analyzed for indicated mRNA transcripts by  
 182 qPCR at 14 and 21 dpi, as well as following mock infection. Data are representative of 5-  
 183 9 mice per group and represent the mean  $\pm$  SEM, \* $P$ <.05, by Mann-Whitney  $U$  test.

184



185 **SI References**

186

187 1. L. D. Eckerle, *et al.*, Infidelity of SARS-CoV Nsp14-exonuclease mutant virus  
188 replication is revealed by complete genome sequencing. *PLoS Pathog.* **6**, e1000896  
189 (2010).

190 2. D. K. Meyerholz, A. P. Beck, Principles and approaches for reproducible scoring of  
191 tissue stains in research. *Lab. Investig. J. Tech. Methods Pathol.* **98**, 844–855  
192 (2018).

193 3. S. Xue, A. Jaszewski, S. Perlman, Identification of a CD4+ T cell epitope within the  
194 M protein of a neurotropic coronavirus. *Virology* **208**, 173–179 (1995).

195 4. R. F. Castro, S. Perlman, CD8+ T-cell epitopes within the surface glycoprotein of a  
196 neurotropic coronavirus and correlation with pathogenicity. *J. Virol.* **69**, 8127–8131  
197 (1995).

198 5. C. C. Bergmann, Q. Yao, M. Lin, S. A. Stohlman, The JHM strain of mouse hepatitis  
199 virus induces a spike protein-specific Db-restricted cytotoxic T cell response. *J. Gen.*  
200 *Viol.* **77**, 315–325 (1996).

201 6. S. Babicki, *et al.*, Heatmapper: web-enabled heat mapping for all. *Nucleic Acids Res.*  
202 **44**, W147-153 (2016).

203
